# Supplementary material for: Ozone pollution may limit the benefits of irrigation to wheat productivity in India
Source: Copernicus journal article supplement (doi:10.5194/egusphere-2024-3371), 2024-11-15
Supplement: Supplementary file 1 [file egusphere-2024-3371-supplement.pdf]

## Supplementary material

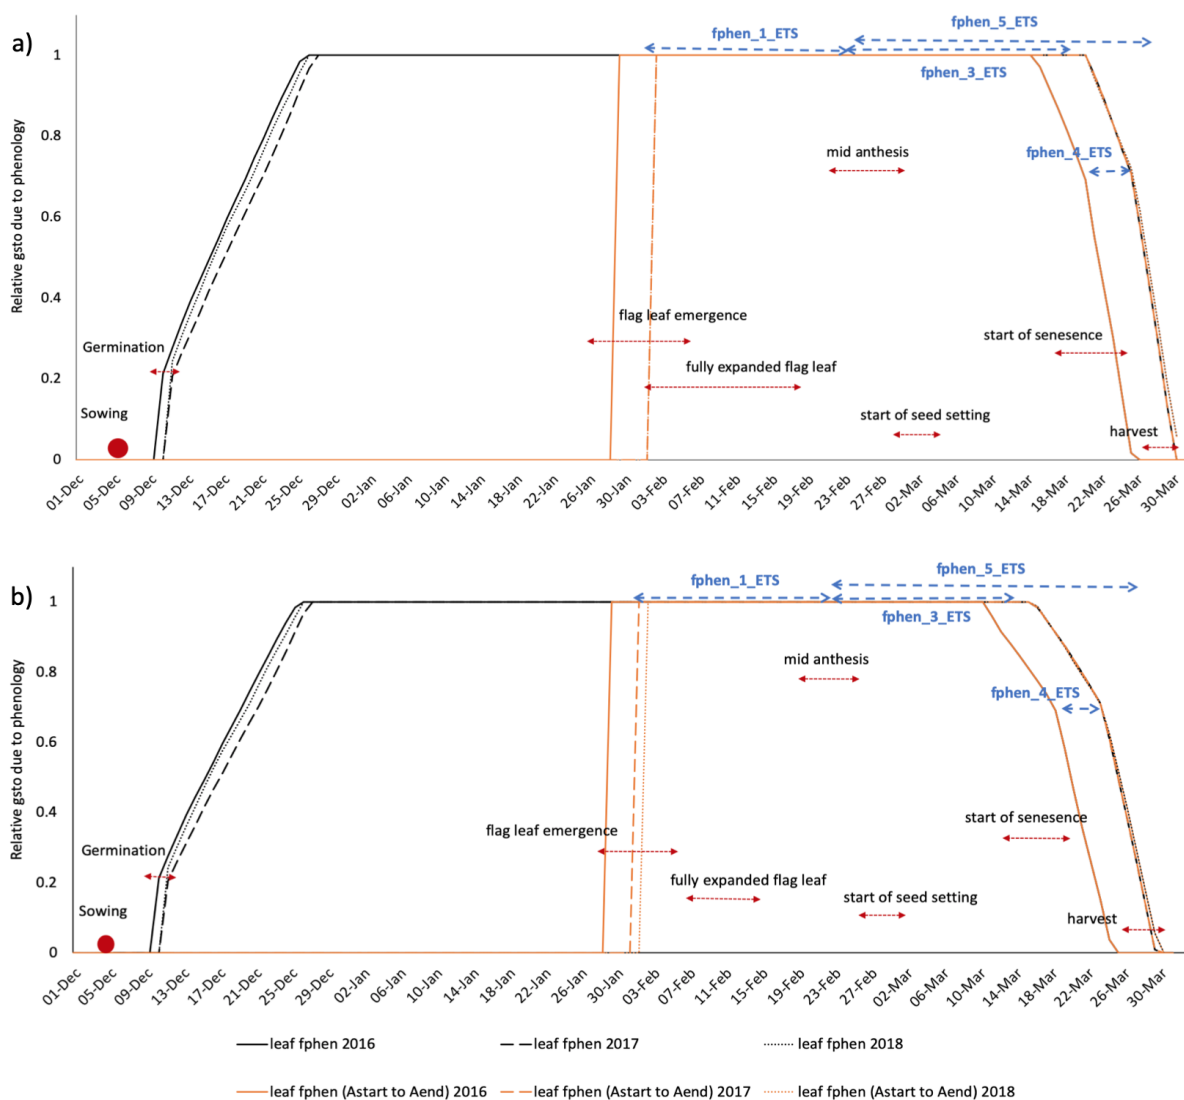

**Fig. S1.** The ETS model parameterised for HUW-234 (a) and HD-3118 (b). The time range for phenological stages observed for years 2016-18 from the experimental data are represented by red arrows; sowing, germination, flag leaf emergence, fully expanded flag leaf, start of seed setting, start of senescence and harvest. Blue arrows and labels illustrate  $f_{\text{phen}_{1-5\_ETS}}$  for each cultivar.

**Table S1.** Relative yield loss (%) under elevated ozone compared to ambient ozone based on absolute grain yields obtained for HUW-234 and HD-3118 under experimental conditions in Varanasi from 2016-18. (Agrawal, Pers. Comm.)

Ambient ozone (NF): non-filtered ozone treatment (average 51.4 ppb); elevated ozone (NF+): ambient ozone + 20ppb between 10:00-15:00 (equal to on average 65.9 ppb).

| Cultivar | Mean grain yield under NF $\pm$ SD (g m <sup>-2</sup> ) | Mean grain yield under NF+ $\pm$ SD (g m <sup>-2</sup> ) | RYL obtained for NF+ compared to NF (%) |
|----------|---------------------------------------------------------|----------------------------------------------------------|-----------------------------------------|
| HUW-234  | 533.4 $\pm$ 159.1                                       | 420.4 $\pm$ 130.6                                        | <b>21.2</b>                             |
| HD-3118  | 432.8 $\pm$ 104.8                                       | 332.3 $\pm$ 63.1                                         | <b>23.2</b>                             |
